# Supplementary material
Source: PubMed Central journal article supplement (PMC1746916)
Supplement: thorax_59_12_1020__1.pdf [file thorax_59_12_1020__1.pdf]

Table S1 Univariate analysis of potential risk factors for readmission

| <b>Variables</b>                                           | <b>Crude HRs (95% CI)</b> | <b>p value</b> |
|------------------------------------------------------------|---------------------------|----------------|
| Age (per year)                                             | 1.02 (0.99 to 1.05)       | 0.126          |
| Male sex                                                   | 0.74 (0.44 to 1.24)       | 0.252          |
| On home oxygen before index admission                      | 1.44 (0.93 to 1.29)       | 0.100          |
| BMI (per kg/m <sup>2</sup> )                               | 0.96 (0.91 to 1.01)       | 0.153          |
| MRC score 4–5                                              | 1.47 (0.96 to 2.25)       | 0.080          |
| Katz ADL score 0–4                                         | 2.04 (1.31 to 3.17)       | 0.002#         |
| Charlson’s co-morbidity score 2 or above                   | 0.98 (0.62 to 1.53)       | 0.912          |
| Current smoker                                             | 0.53 (0.21 to 1.30)       | 0.166          |
| Smoking history (pack-year)                                | 0.99 (0.99 to 1.00)       | 0.702          |
| History of previous intubation                             | 0.71 (0.39 to 1.29)       | 0.260          |
| History of previous NIV                                    | 1.42 (0.91 to 2.21)       | 0.128          |
| FEV <sub>1</sub> (% predicted)                             | 0.99 (0.98 to 1.01)       | 0.434          |
| Do-not-intubate status                                     | 1.60 (1.01 to 2.54)       | 0.046*         |
| Hospitalized days in previous year >21                     | 1.99 (1.28 to 3.09)       | 0.002#         |
| Baseline respiratory rate per minute                       | 0.98 (0.94 to 1.02)       | 0.249          |
| Presence of pneumonia                                      | 1.29 (0.80 to 2.07)       | 0.296          |
| Haemoglobin (per g/dl)                                     | 0.90 (0.80 to 1.02)       | 0.100          |
| White cell count (per 1×10 <sup>9</sup> /mm <sup>3</sup> ) | 0.99 (0.95 to 1.03)       | 0.654          |
| Albumin (per g/dL)                                         | 0.97 (0.93 to 1.02)       | 0.187          |
| Cor pulmonale by ECG                                       | 0.88 (0.56 to 1.39)       | 0.577          |
| APACHE II score (per 5 units increase)                     | 1.03 (0.84 to 1.25)       | 0.803          |
| Highest IPAP required (per 1 ♣cm H <sub>2</sub> O)         | 1.01 (0.93 to 1.09)       | 0.903          |
| Highest EPAP required (per 1 ♣cm H <sub>2</sub> O)         | 1.03 (0.94 to 1.13)       | 0.539          |
| Duration of NIV (per day)                                  | 1.02 (0.95 to 1.10)       | 0.572          |

\*Statistically significant at p<0.05; #statistically significant at p<0.01.

HR, Hazard ratio; CI, confidence interval.

Table S2 Multivariate analysis of potential risk factors for readmission

| <b>Multivariate models</b>             | <b>Adjusted HRs (95% CI)</b> | <b>p value</b> |
|----------------------------------------|------------------------------|----------------|
| Model 1                                |                              |                |
| Katz ADL score 0–4                     | 1.75 (1.10 to 2.76)          | 0.018*         |
| Hospitalised days in previous year >21 | 1.74 (1.11 to 2.74)          | 0.016*         |
| Model 2                                |                              |                |
| Katz ADL score 0–4                     | 1.66 (1.03 to 2.70)          | 0.039*         |
| Hospitalised days in previous year >21 | 1.69 (1.07 to 2.69)          | 0.025*         |
| Do-not-intubate status                 | 1.18 (0.71 to 1.95)          | 0.527          |

\*Statistically significant at  $p < 0.05$ .

HR, Hazard ratio; CI, confidence interval.

Table S3 Univariate analysis of potential risk factors for recurrent life-threatening event (recurrent acute hypercapnic respiratory failure requiring assisted ventilation death)

| <b>Variables</b>                                           | <b>Crude HRs (95% CI)</b> | <b>p value</b> |
|------------------------------------------------------------|---------------------------|----------------|
| Age (per year)                                             | 1.01 (0.99 to 1.04)       | 0.326          |
| Male sex                                                   | 1.42 (0.79 to 2.53)       | 0.235          |
| On home oxygen before index admission                      | 2.12 (1.34 to 3.35)       | 0.001#         |
| BMI (per kg/m <sup>2</sup> )                               | 0.93 (0.88 to 0.99)       | 0.026*         |
| MRC score 4–5                                              | 2.03 (1.29 to 3.19)       | 0.002#         |
| Katz ADL score 0–4                                         | 1.64 (1.04 to 2.59)       | 0.034*         |
| Charlson’s co-morbidity score 2 or above                   | 1.02 (0.63 to 1.62)       | 0.952          |
| Current smoker                                             | 0.79 (0.35 to 1.83)       | 0.589          |
| Smoking history (pack-year)                                | 0.99 (0.99 to 1.01)       | 0.753          |
| History of previous intubation                             | 1.61 (0.89 to 2.94)       | 0.118          |
| History of previous NIV                                    | 1.37 (0.87 to 2.16)       | 0.180          |
| FEV <sub>1</sub> (% predicted)                             | 0.99 (0.97 to 1.00)       | 0.116          |
| Do-not-intubate status                                     | 2.41 (1.52 to 3.79)       | 0.003#         |
| Hospitalised days in previous year >21                     | 1.95 (1.24 to 3.07)       | 0.004#         |
| Baseline respiratory rate per minute                       | 1.02 (0.98 to 1.06)       | 0.308          |
| Presence of pneumonia                                      | 0.98 (0.59 to 1.63)       | 0.940          |
| Haemoglobin (per g/dl)                                     | 0.89 (0.78 to 1.02)       | 0.083          |
| White cell count (per 1×10 <sup>9</sup> /mm <sup>3</sup> ) | 0.99 (0.95 to 1.03)       | 0.570          |
| Albumin (per g/dl)                                         | 0.97 (0.93 to 1.02)       | 0.291          |
| Cor pulmonale by ECG                                       | 1.07 (0.67 to 1.72)       | 0.769          |
| APACHE II score (per 5 units increase)                     | 1.26 (1.03 to 1.54)       | 0.028*         |
| Highest IPAP required (per 1♣cm H <sub>2</sub> O)          | 1.01 (0.93 to 1.09)       | 0.808          |
| Highest EPAP required (per 1♣cm H <sub>2</sub> O)          | 1.01 (0.92 to 1.12)       | 0.813          |
| Duration of NIV (per day)                                  | 1.09 (1.02 to 1.19)       | 0.027*         |

\*Statistically significant at p<0.05; #statistically significant at p<0.01.

HR, Hazard ratio; CI, confidence interval.

Table S4 Multivariate analysis of potential risk factors for recurrent life-threatening event (recurrent acute hypercapnic respiratory failure requiring assisted ventilation death)

| <b>Multivariate models</b>             | <b>Adjusted HRs (95% CI)</b> | <b>p value</b> |
|----------------------------------------|------------------------------|----------------|
| <b>Model 1</b>                         |                              |                |
| On home oxygen before index admission  | 2.07 (1.30 to 3.30)          | 0.002#         |
| APACHE II score (per 5 units increase) | 1.34 (1.09 to 1.66)          | 0.006#         |
| BMI (per kg/m <sup>2</sup> )           | 0.93 (0.87 to 0.99)          | 0.041*         |
| <b>Model 2</b>                         |                              |                |
| On home oxygen before index admission  | 1.79 (1.09 to 2.93)          | 0.021*         |
| APACHE II score (per 5 units increase) | 1.30 (1.06 to 1.60)          | 0.013*         |
| BMI (per kg/m <sup>2</sup> )           | 0.93 (0.87 to 0.99)          | 0.040*         |
| MRC score 4–5                          | 1.56 (0.96 to 2.53)          | 0.071          |
| <b>Model 3</b>                         |                              |                |
| On home oxygen before index admission  | 1.86 (1.12 to 3.06)          | 0.016*         |
| APACHE II score (per 5 units increase) | 1.31 (1.06 to 1.62)          | 0.012*         |
| BMI (per kg/m <sup>2</sup> )           | 0.94 (0.88 to 1.00)          | 0.060          |
| Hospitalised days in previous year >21 | 1.35 (0.82 to 2.22)          | 0.233          |
| <b>Model 4</b>                         |                              |                |
| On home oxygen before index admission  | 1.82 (1.12 to 2.94)          | 0.016*         |
| APACHE II score (per 5 units increase) | 1.21 (0.96 to 1.51)          | 0.103          |
| BMI (per kg/m <sup>2</sup> )           | 0.93 (0.87 to 0.99)          | 0.036*         |
| Do-not-intubate status                 | 1.82 (1.09 to 3.02)          | 0.023*         |

\*Statistically significant at p<0.05; #statistically significant at p<0.01.  
HR, Hazard ratio; CI, confidence interval.

Table S5 Univariate analysis of potential risk factors for post-discharge death

| <b>Variables</b>                                           | <b>Crude HRs (95% CI)</b> | <b>p value</b> |
|------------------------------------------------------------|---------------------------|----------------|
| Age (per year)                                             | 1.02 (0.99 to 1.06)       | 0.171          |
| Male sex                                                   | 1.29 (0.67 to 2.48)       | 0.447          |
| On home oxygen before index admission                      | 2.24 (1.30 to 3.84)       | 0.003#         |
| BMI (per kg/m <sup>2</sup> )                               | 0.93 (0.86 to 1.00)       | 0.049*         |
| MRC score 4–5                                              | 3.07 (1.75 to 5.41)       | <0.001#        |
| Katz ADL score 0–4                                         | 1.75 (1.05 to 2.93)       | 0.033*         |
| Charlson’s co-morbidity score 2 or above                   | 1.13 (0.67 to 1.91)       | 0.646          |
| Current smoker                                             | 0.82 (0.29 to 2.26)       | 0.699          |
| Smoking history (pack-year)                                | 0.99 (0.99 to 1.00)       | 0.579          |
| History of previous intubation                             | 1.36 (0.69 to 2.68)       | 0.378          |
| History of previous NIV                                    | 1.18 (0.69 to 1.99)       | 0.541          |
| FEV <sub>1</sub> (% predicted)                             | 0.99 (0.98 to 1.01)       | 0.463          |
| Do-not-intubate status                                     | 2.39 (1.44 to 3.99)       | 0.001#         |
| Hospitalised days in previous year > 21                    | 1.78 (1.05 to 3.01)       | 0.032*         |
| Baseline respiratory rate per minute                       | 1.01 (0.97 to 1.05)       | 0.736          |
| Presence of pneumonia                                      | 1.23 (0.70 to 2.15)       | 0.474          |
| Haemoglobin (per g/dl)                                     | 0.88 (0.76 to 1.01)       | 0.067          |
| White cell count (per 1×10 <sup>9</sup> /mm <sup>3</sup> ) | 0.99 (0.95 to 1.04)       | 0.772          |
| Albumin (per g/dl)                                         | 0.96 (0.91 to 1.02)       | 0.182          |
| Cor pulmonale by ECG                                       | 1.15 (0.68 to 1.96)       | 0.601          |
| APACHE II score (per 5 units increase)                     | 1.26 (0.99 to 1.61)       | 0.058          |
| Highest IPAP required (per 1 ♣cm H <sub>2</sub> O)         | 1.02 (0.93 to 1.12)       | 0.712          |
| Highest EPAP required (per 1 ♣cm H <sub>2</sub> O)         | 1.00 (0.89 to 1.13)       | 0.995          |
| Duration of NIV (per day)                                  | 1.09 (0.99 to 1.19)       | 0.061          |

\*Statistically significant at p<0.05; #statistically significant at p<0.01.

HR, Hazard ratio; CI, confidence interval.

Table S6 Multivariate analysis of potential risk factors for post-discharge death

| <b>Multivariate models</b>             | <b>Adjusted HRs (95% CI)</b> | <b>p value</b> |
|----------------------------------------|------------------------------|----------------|
| Model 1                                |                              |                |
| MRC score 4–5                          | 3.07 (1.75 to 5.41)          | <0.001#        |
| Model 2                                |                              |                |
| MRC score 4–5                          | 2.59 (1.43 to 4.73)          | 0.002#         |
| On home oxygen before index admission  | 1.61 (0.91 to 2.85)          | 0.104          |
| Model 3                                |                              |                |
| MRC score 4–5                          | 2.53 (1.35 to 4.74)          | 0.004#         |
| Do-not-intubate status                 | 1.61 (0.91 to 2.85)          | 0.135          |
| Model 4                                |                              |                |
| MRC score 4–5                          | 3.02 (1.62 to 5.63)          | 0.001#         |
| Katz ADL score 0–4                     | 1.04 (0.59 to 1.83)          | 0.891          |
| Model 5                                |                              |                |
| MRC score 4–5                          | 2.83 (1.58 to 5.07)          | <0.001#        |
| Hospitalised days in previous year >21 | 1.35 (0.78 to 2.33)          | 0.282          |
| Model 6                                |                              |                |
| MRC score 4–5                          | 3.11 (1.76 to 5.48)          | <0.001#        |
| BMI (per kg/m <sup>2</sup> )           | 0.92 (0.84 to 1.00)          | 0.050          |

\*Statistically significant at p<0.05; #statistically significant at p<0.01.

HR, Hazard ratio; CI, confidence interval.
